# Supplementary material for: Effects of alcohols as sacrificial reagents on a copper-doped sodium dititanate nanosheets/graphene oxide photocatalyst in CO2 photoreduction
Source: Royal Society of Chemistry journal article supplement (doi:10.1039/d4ra04585h), 2024-01-01

## Supplementary

# Effects of Alcohols as Sacrificial Reagents on A Copper-doped Sodium Dtitanate Nanosheets/Graphene Oxide Photocatalyst in CO<sub>2</sub> Photoreduction

*Nutkamol Kitjanukit<sup>1</sup>, Wannisa Neamsung<sup>1</sup>, Apisit Karawek<sup>1</sup>, Napat Lertthanaphol<sup>1</sup>, Napatr Chongkol, Koki Hiramatsu<sup>2</sup>, Tomoya Sekiguchi<sup>2</sup>, Soraya Pornsuwan<sup>3</sup>, Takahiro Sakurai<sup>4</sup>, Woranart Jonglertjunya<sup>1</sup>, Poomiwat Phadungbut<sup>1</sup>, Yuichi Ichihashi<sup>2</sup>, and Sira Srinives<sup>1\*</sup>*

<sup>1</sup> Nanocomposite Engineering Laboratory (NanoCEN), Department of Chemical Engineering, Faculty of Engineering, Mahidol University, Nakhon Pathom, 73170, Thailand.

<sup>2</sup> Department of Chemical Science and Engineering, Graduate School of Engineering, Kobe University, Rokkodaicho 1-1, Nada, Kobe, 657-8501, Japan

<sup>3</sup> Department of Chemistry, Faculty of Science and Center of Excellence for Innovation in Chemistry, Mahidol University, Bangkok, 10400, Thailand

<sup>4</sup> Research Facility Center for Science and Technology, Kobe University, Rokkodai 1-1, Nada, Kobe, 657-8501, Japan

\* Corresponding author Sira Srinives, Email: sira.sri@mahidol.ac.th: Tel + 66 846482406 (Thailand)

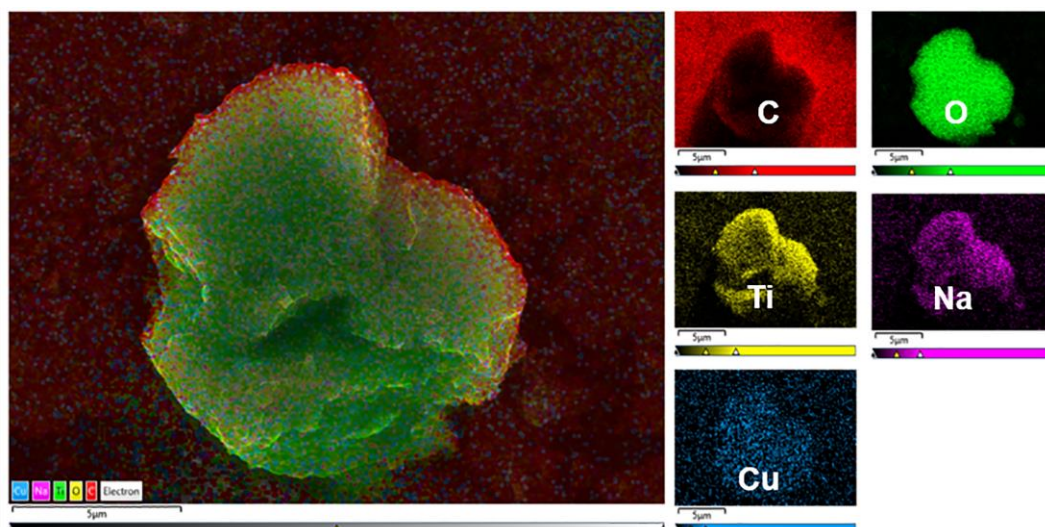

**Fig. S1** EDS scan of CTGN, showing atomic composition.

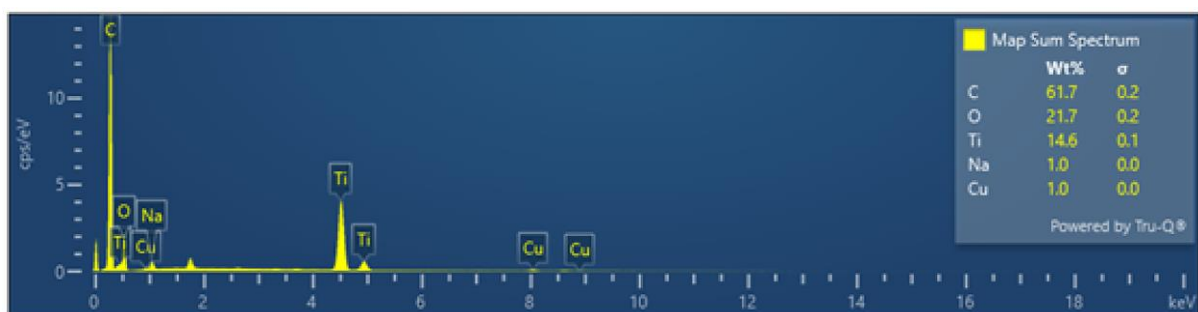

**Fig. S2** Percentage of CTGN atomic composition.

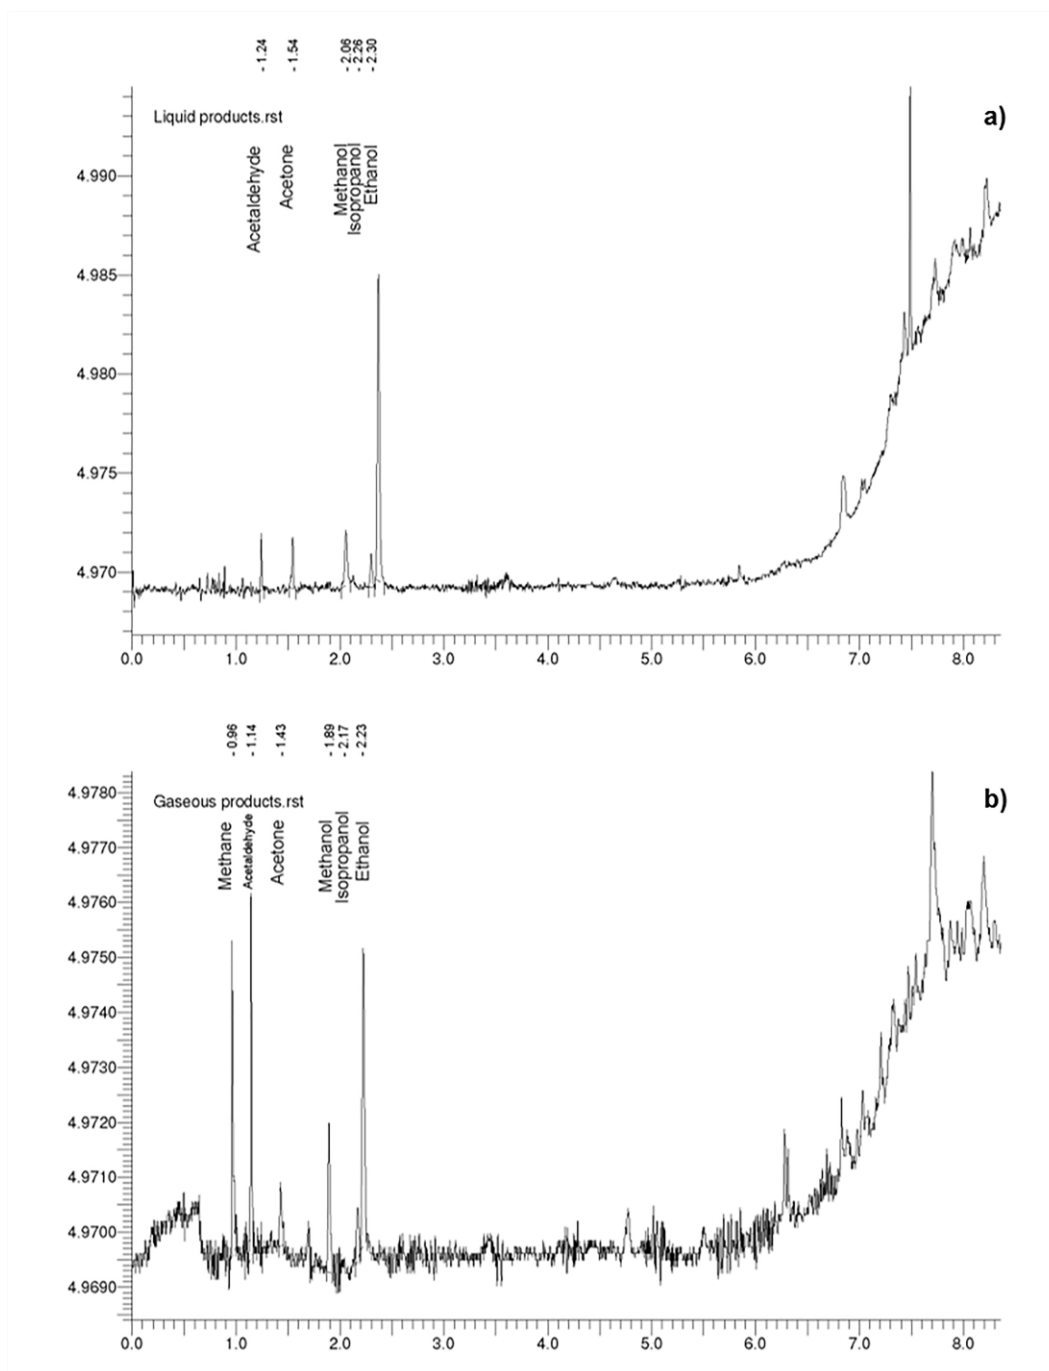

**Fig. S3** Example of a gas chromatography analysis of (a) liquid and (b) gaseous products.

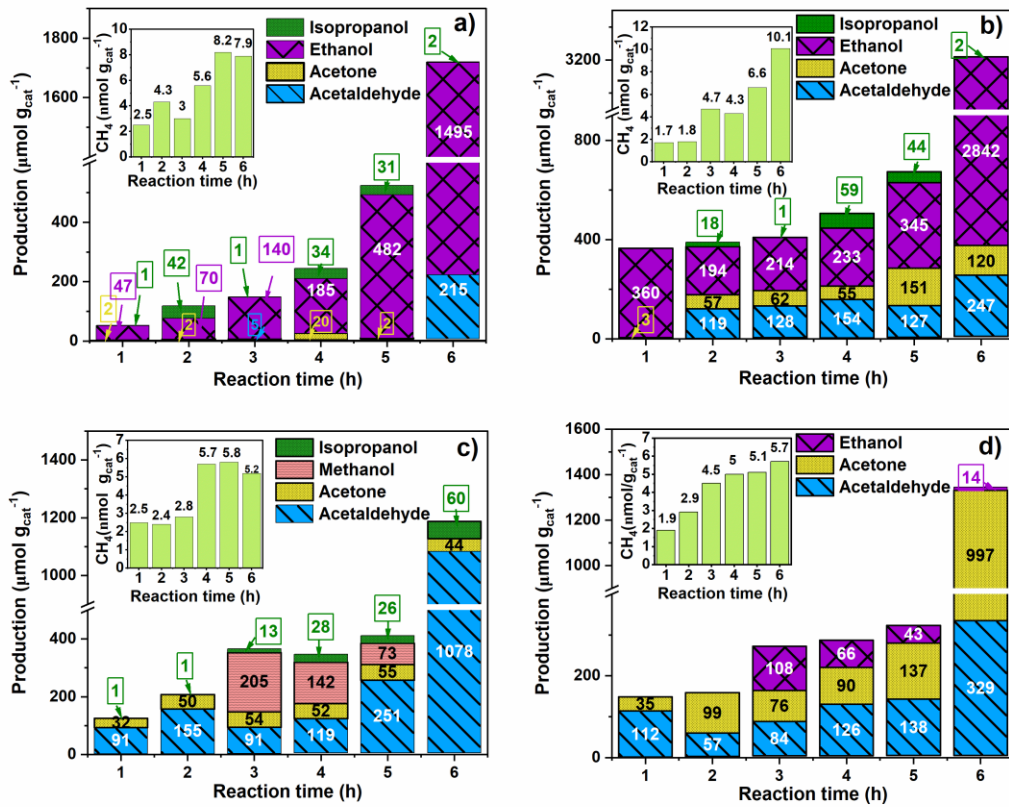

**Fig. S4** Effect of reaction time on each liquid and gas product corresponded to (a) water, (b) methanol, (c) ethanol, and (d) isopropanol SCRs.

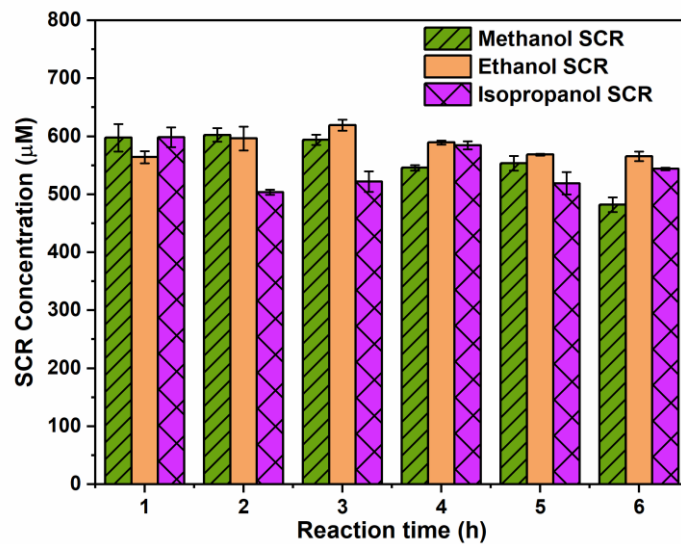

**Fig. S5** SCR concentration changes concerning the time of CO<sub>2</sub> photoreduction operation.

**List S1** Lists of total reaction equations for the formation of methane, methanol, ethanol, acetaldehyde, isopropanol, and acetone.

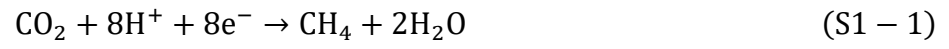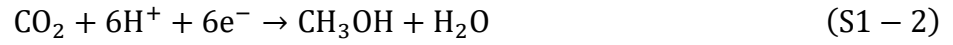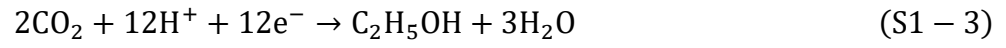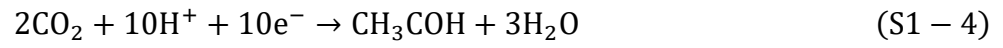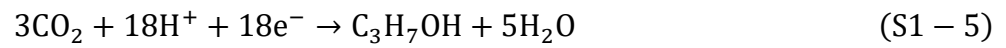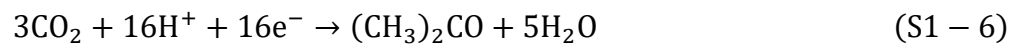

Supplement: d4ra04585h1.pdf [file d4ra04585h1.pdf]
